# Supplementary material for: First-principles study on a new chloride solid lithium-ion conductor material with high ionic conductivity
Source: Royal Society of Chemistry journal article supplement (doi:10.1039/d3ta07943k), 2024-01-01
Supplement: d3ta07943k1.pdf [file d3ta07943k1.pdf]

## SUPPLEMENTARY INFORMATION

### First-Principles Study on a New Chloride Solid Lithium-Ion Conductor Material with High Ionic Conductivity

*Xiao Fu*<sup>a,b</sup>, *Yuqi Wang*<sup>a,c</sup>, *Jing Xu*<sup>a,c</sup>, *Qifan Yang*<sup>a,b</sup>, *Huican Mao*<sup>a,d,\*</sup>, *Ruijuan Xiao*<sup>a,b,\*</sup>, *Hong Li*<sup>a,b</sup>

<sup>a</sup> Beijing Advanced Innovation Center for Materials Genome Engineering, Institute of Physics,

Chinese Academy of Sciences, Beijing 100190, China

<sup>b</sup> Center of Materials Science and Optoelectronics Engineering, University of Chinese Academy

of Sciences, Beijing 100049, China

<sup>c</sup> School of physical sciences, University of Chinese Academy of Sciences, Beijing 100049, China

<sup>d</sup> Department of Energy Storage Science and Engineering, School of Metallurgical and Ecological

Engineering, University of Science and Technology Beijing, Beijing 100083, China

#### Corresponding Author

\*E-mail: [hcmiao@ustb.edu.cn](mailto:hcmiao@ustb.edu.cn)

\*E-mail: [rjxiao@iphy.ac.cn](mailto:rjxiao@iphy.ac.cn)

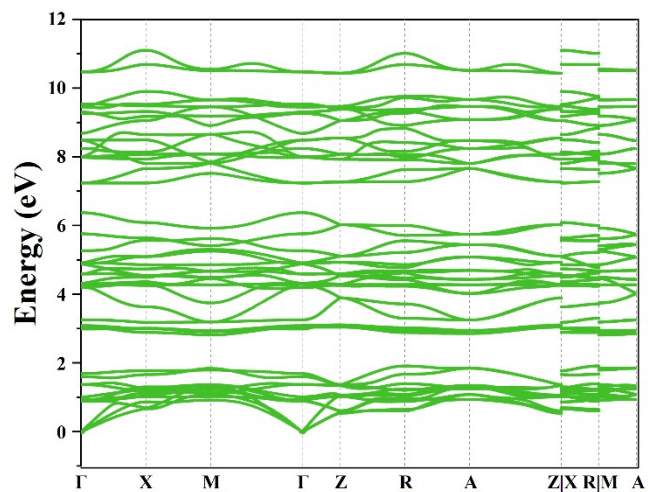

**Fig. S1.** The phonon energy spectrum of LSC calculated using the DFPT method.

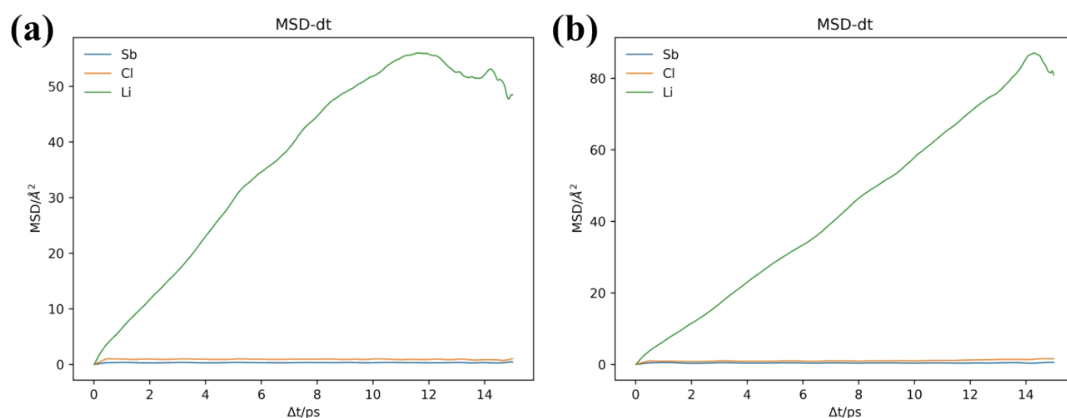

**Fig. S2.** MSD plots of 600K AIMD simulations in (a)  $2 \times 2 \times 1$  supercell and (b)  $2 \times 2 \times 2$  supercell of LSC, respectively.

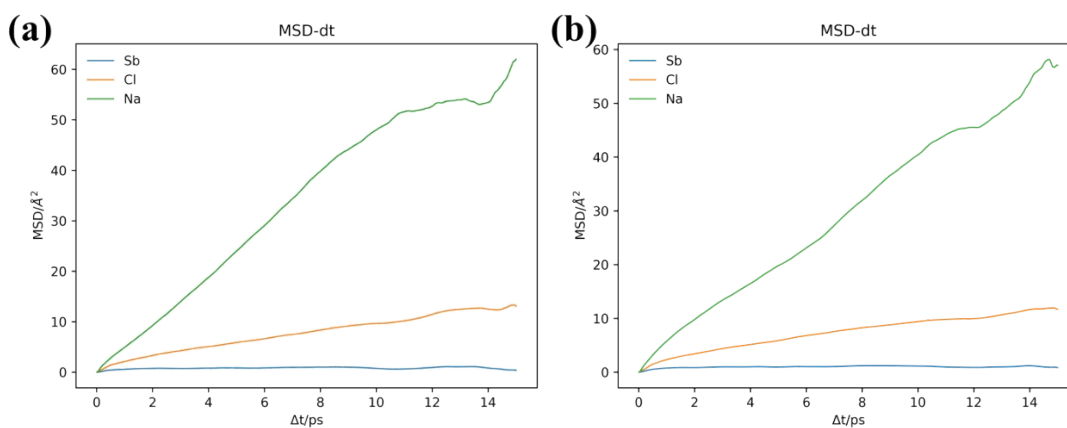

**Fig. S3.** MSD plots of 800K AIMD simulations in (a)  $2 \times 2 \times 1$  supercell and (b)  $2 \times 2 \times 2$  supercell of NSC, respectively.

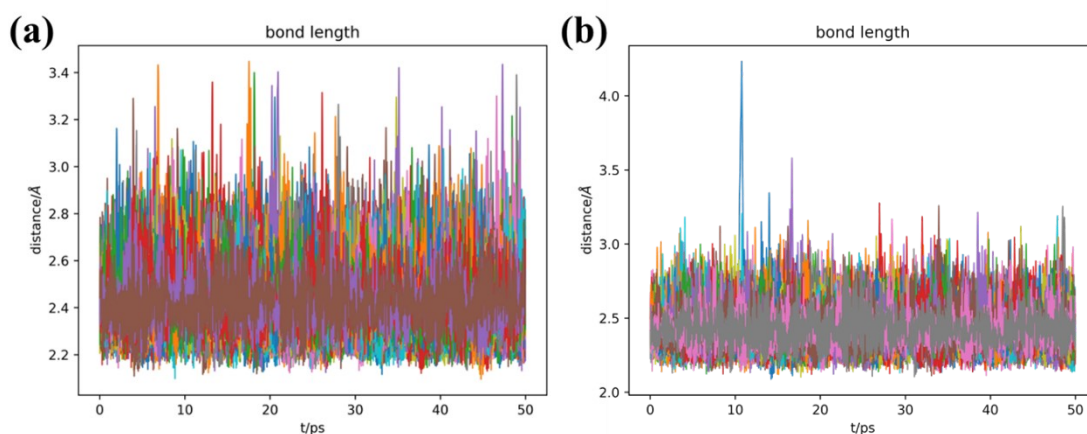

**Fig. S4.** Bond length analysis of 1000K AIMD simulations for all the Sb-Cl bonds in (a) LSC and (b) NSC

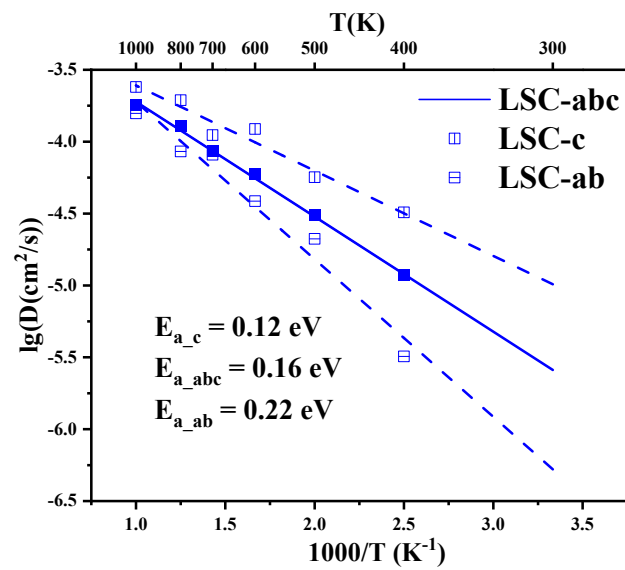

**Fig. S5.** The projected Arrhenius plots of diffusivity in LSC, along [001] direction, marked as LSC-c, and (001) planes, marked as LSC-ab.

**Table S1.** DFT fully relaxed LSC structural parameters, with interstitial sites denoted as Li<sub>i</sub>. Space group:  $P4_2/m$  (No. 84); Cell parameters:  $a = b = 6.4443 \text{ \AA}$ ,  $c = 11.0519 \text{ \AA}$ .

| Atom            | Wyckoff Site | x      | y      | z      | Occupancy |
|-----------------|--------------|--------|--------|--------|-----------|
| Sb              | 2c           | 0.5000 | 0.0000 | 0.5000 | 1.0       |
| Cl              | 4j           | 0.2587 | 0.2780 | 0.5000 | 1.0       |
| Cl              | 8k           | 0.7006 | 0.1782 | 0.3441 | 1.0       |
| Li              | 2e           | 0.0000 | 0.0000 | 0.7500 | 1.0       |
| Li <sub>i</sub> | 2f           | 0.5000 | 0.5000 | 0.2500 | -         |
| Li <sub>i</sub> | 2a           | 0.0000 | 0.0000 | 0.0000 | -         |
| Li <sub>i</sub> | 4i           | 0.5000 | 0.0000 | 0.1500 | -         |

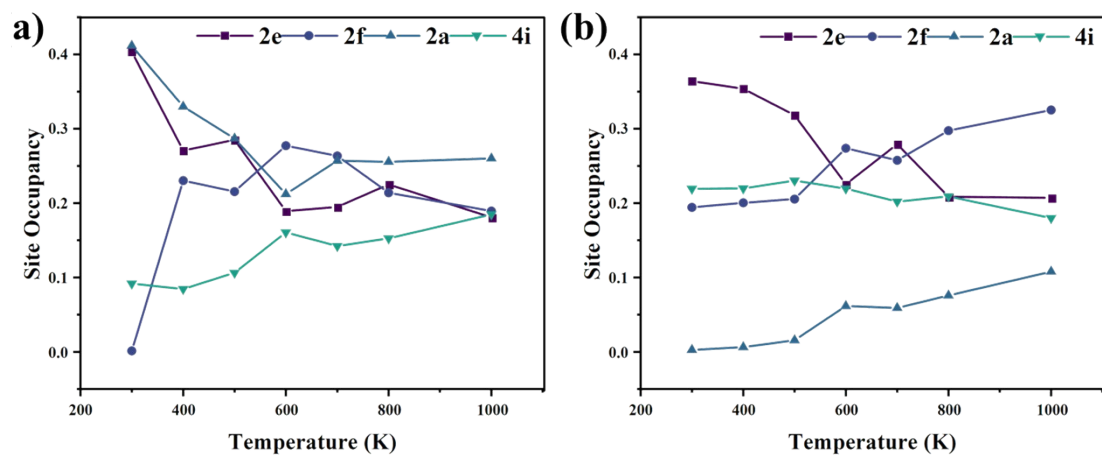

**Fig. S6.** Site occupancy analysis for (a) Li of LSC and (b) Na of NSC in AIMD simulations at temperatures from 300K to 1000K

**Table S2.** The minimum distance between 2e Li sites and interstitial sites in LSC calculated by BV method.

| Sites       | 2e(self) | 2a   | 2f   | 4i   |
|-------------|----------|------|------|------|
| Distance /Å | 5.53     | 2.76 | 4.56 | 3.41 |

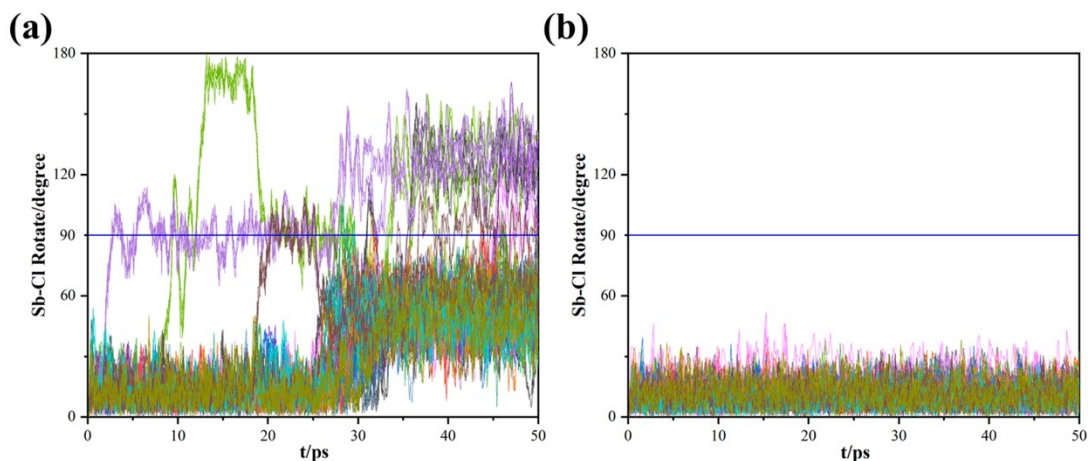

**Fig. S7.** Sb-Cl bond rotate angle in LSC AIMD simulation at (a) 800K and (b) 400K.

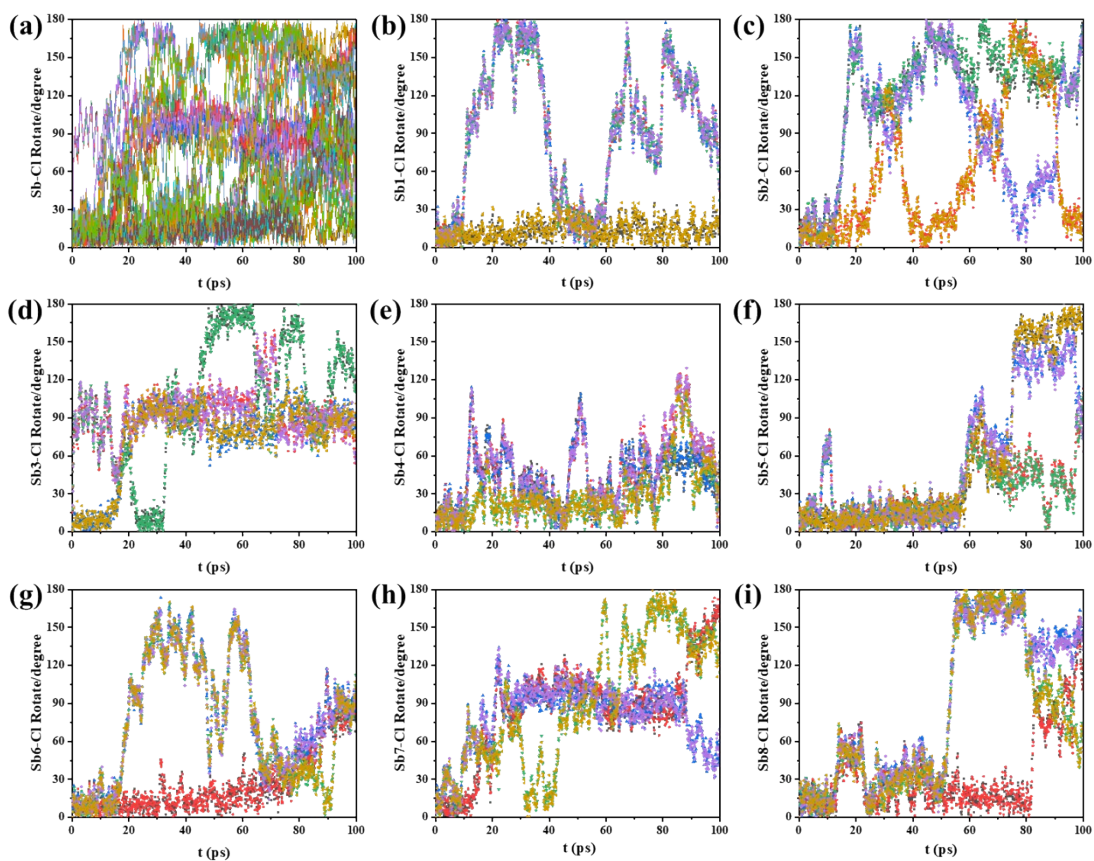

**Fig. S8.** Sb-Cl bond rotate angle in NSC AIMD simulation at 500K, (a) for all bonds and (b-i) for each Sb centre, respectively.



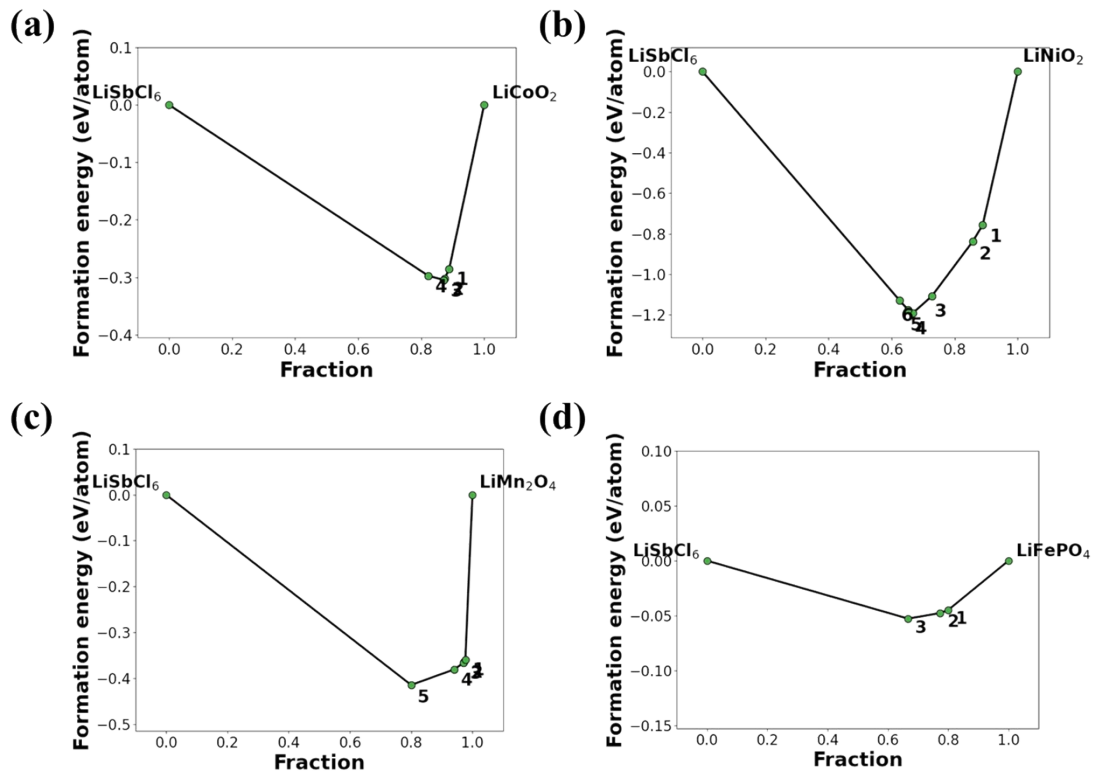

**Fig. S9.** Reaction phase diagrams between LSC and (a) $\text{LiCoO}_2$ , (b) $\text{LiNiO}_2$ , (c) $\text{LiMn}_2\text{O}_4$  and (d) $\text{LiFePO}_4$ . Calculated with data from Materials Project.

**Table S3.** The independent elastic constants  $C_{ij}$  (GPa), bulk modulus  $B$  (GPa), shear modulus  $G$  (GPa), Young's modulus  $E$  (GPa), Poisson's ratio  $\mu$ , and  $B/G$  ratio of LSC and NSC.

|     | $C_{11}$ | $C_{44}$ | $C_{12}$ | $B$   | $G$   | $E$    | $\mu$ | $B/G$ |
|-----|----------|----------|----------|-------|-------|--------|-------|-------|
| LSC | 13.048   | 5.459    | 0.550    | 6.447 | 4.367 | 10.689 | 0.224 | 1.476 |
| NSC | 11.073   | 2.873    | 3.258    | 7.035 | 2.897 | 7.641  | 0.319 | 2.429 |
